# Supplementary material
Source: publisher site journal article supplement (https://www.dovepress.com/article/452805)
Supplement: Supplementary file 1 [file get_supplementary_file.php]

Table S1 Microbiological Characteristics of Patients Treated with CZA Therapy

| Pathogen | Total  (n=83) | Carbapenemases | Multiple Bacteria (n=6) | Single Bacteria (n=77) |
| --- | --- | --- | --- | --- |
| KPN | 75 | KPC | 0 | 75 (97.4) |
| PAE | 1 | UD | 0 | 1 (1.3) |
| ECO | 1 | KPC | 0 | 1 (1.3) |
| KPN+PAE | 5 | KPN(KPC), PAE(UD) | 5(100) | 0 |
| KPN+ECO | 1 | KPC | 1(100) | 0 |

**Notes**: Data are expressed as number (%).

**Abbreviations:** KPN, Klebsiella pneumoniae; PAE, Pseudomonas aeruginosa; ECO, Escherichia coli; KPC, Klebsiella pneumoniae carbapenemase. UD, Undetected.
